# Supplementary material for: Blockade of IL-6R prevents preterm birth and adverse neonatal outcomes
Source: PubMed Central journal article supplement — eBioMedicine. 2023 Nov 7;98:104865. doi: 10.1016/j.ebiom.2023.104865 (PMC10665693; doi:10.1016/j.ebiom.2023.104865), 2023-11-07
Supplement: mmc1.pdf [file mmc1.pdf]

## **SUPPLEMENTARY MATERIAL**

### **Table of contents**

**Fig. S1.** Decidual gene expression is not modulated by IL-1 $\alpha$  or aIL-6R

**Fig. S2.** Intra-amniotic IL-1 $\alpha$ , or treatment with aIL-6R, does not drastically modify neonatal ability to complete the neuromotor tests for surface righting and cliff aversion

**Fig. S3.** Neonatal gut microbiota composition is modified by intra-amniotic IL-1 $\alpha$ , which is partially rescued by aIL-6R treatment

**Fig. S4.** Blockade of IL-6R modifies the abundance of specific bacterial taxa in the neonatal caecum and colon

**Fig. S5.** Leukocyte proportions in the neonatal gut after intra-amniotic IL-1 $\alpha$  exposure or treatment with aIL-6R

**Table S1.** TaqMan assays utilised for RT-PCR

**Table S2.** List of antibodies utilised for flow cytometry

**Table S3.** Preterm labour-associated differential expression of *Il6* in murine uterine and decidual cell types

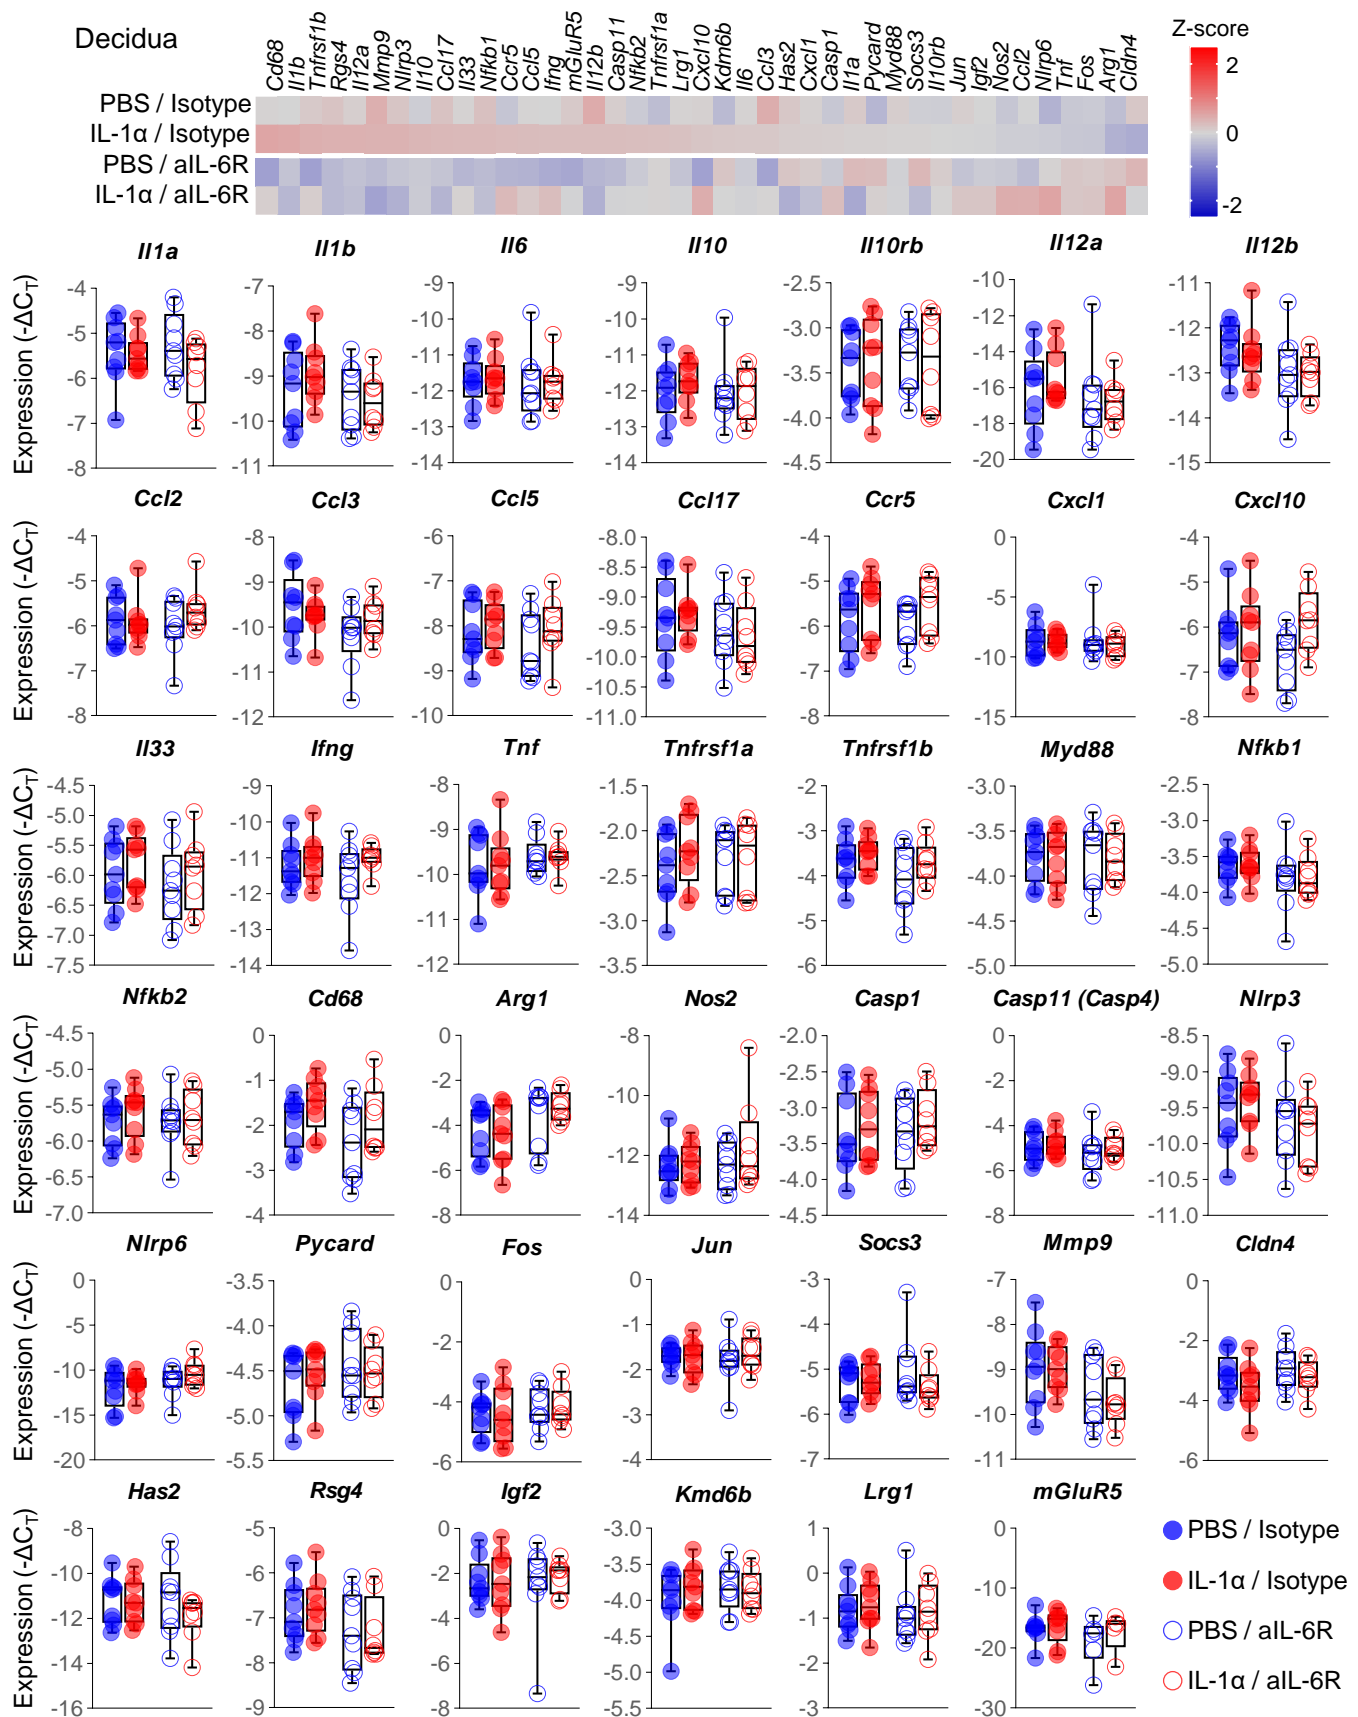

**Fig. S1. Decidual gene expression is not modulated by IL-1 $\alpha$  or aIL-6R.** Representative heatmaps showing Z-scores for gene expression in the decidua (n = 8-9 per group). Red indicates increased expression and blue indicates decreased expression. The expression ( $-\Delta C_T$ ) of *Il1a*, *Il1b*, *Il6*, *Il10*, *Il10rb*, *Il12a*, *Il12b*, *Ccl2*, *Ccl3*, *Ccl5*, *Ccl17*, *Ccr5*, *Cxcl1*, *Cxcl10*, *Il33*, *Ifng*, *Tnf*, *Tnfrsf1a*, *Tnfrsf1b*, *Myd88*, *Nfkb1*, *Nfkb2*, *Cd68*, *Arg1*, *Nos2*, *Casp1*, *Casp11 (Casp4)*, *Nlrp3*, *Nlrp6*, *Pycard*, *Fos*, *Jun*, *Socs3*, *Mmp9*, *Cldn4*, *Has2*, *Rgs4*, *Igf2*, *Kdm6b*, *Lrg1*, and *mGluR5* is represented as box-and-whisker plots where midlines indicate medians, boxes indicate interquartile ranges, and whiskers indicate minimum and maximum values.

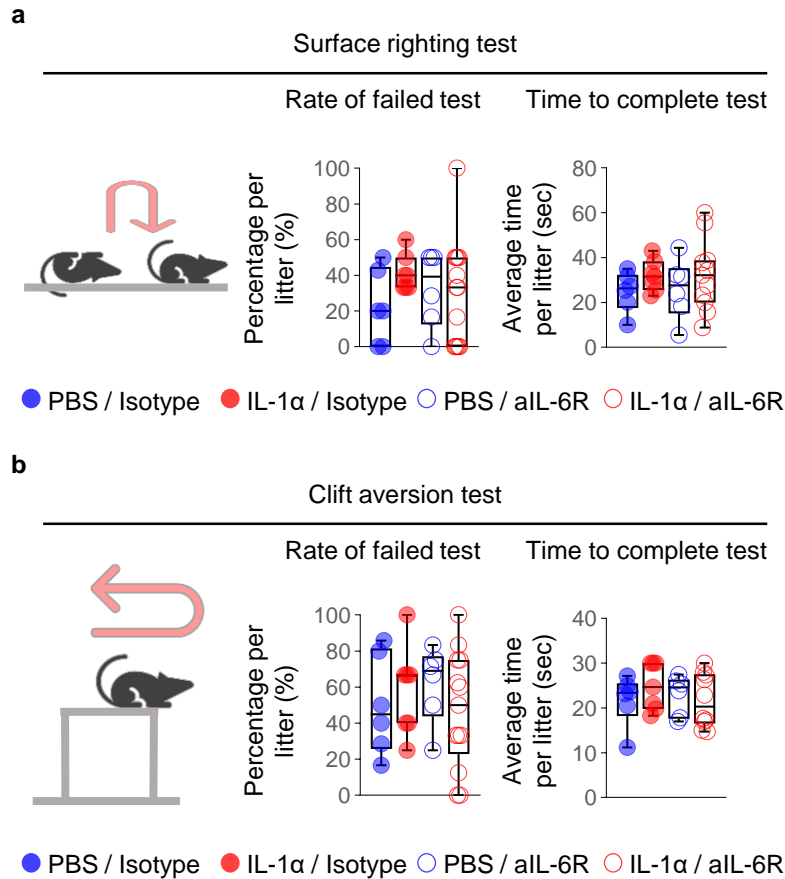

**Fig. S2. Intra-amniotic IL-1 $\alpha$ , or treatment with aIL-6R, does not drastically modify neonatal ability to complete the neuromotor tests for surface righting and cliff aversion.** (a) Schematic diagram of the surface righting test, and quantification of the rate of neonates with a failed test and the time required to complete the test (n = 6-14 litters per group). (b) Schematic diagram of the cliff aversion test, and quantification of the rate of neonates with a failed test and the time required to complete the test (n = 6-14 litters per group). Data are shown as box-and-whisker plots where midlines indicate medians, boxes indicate interquartile ranges, and whiskers indicate minimum and maximum values.

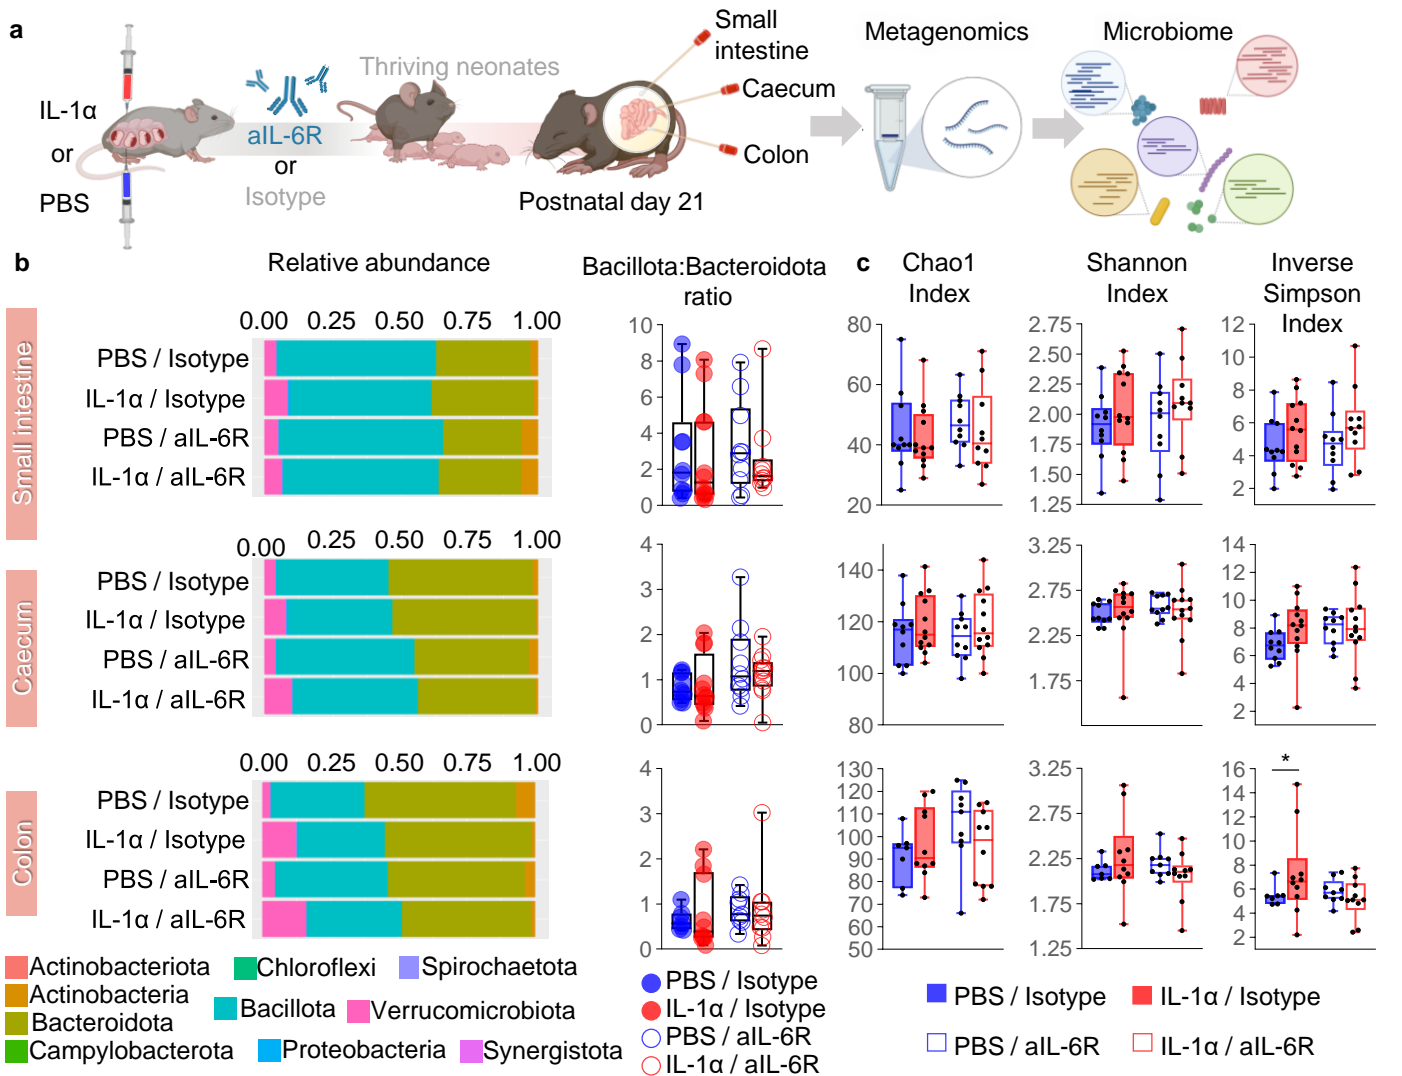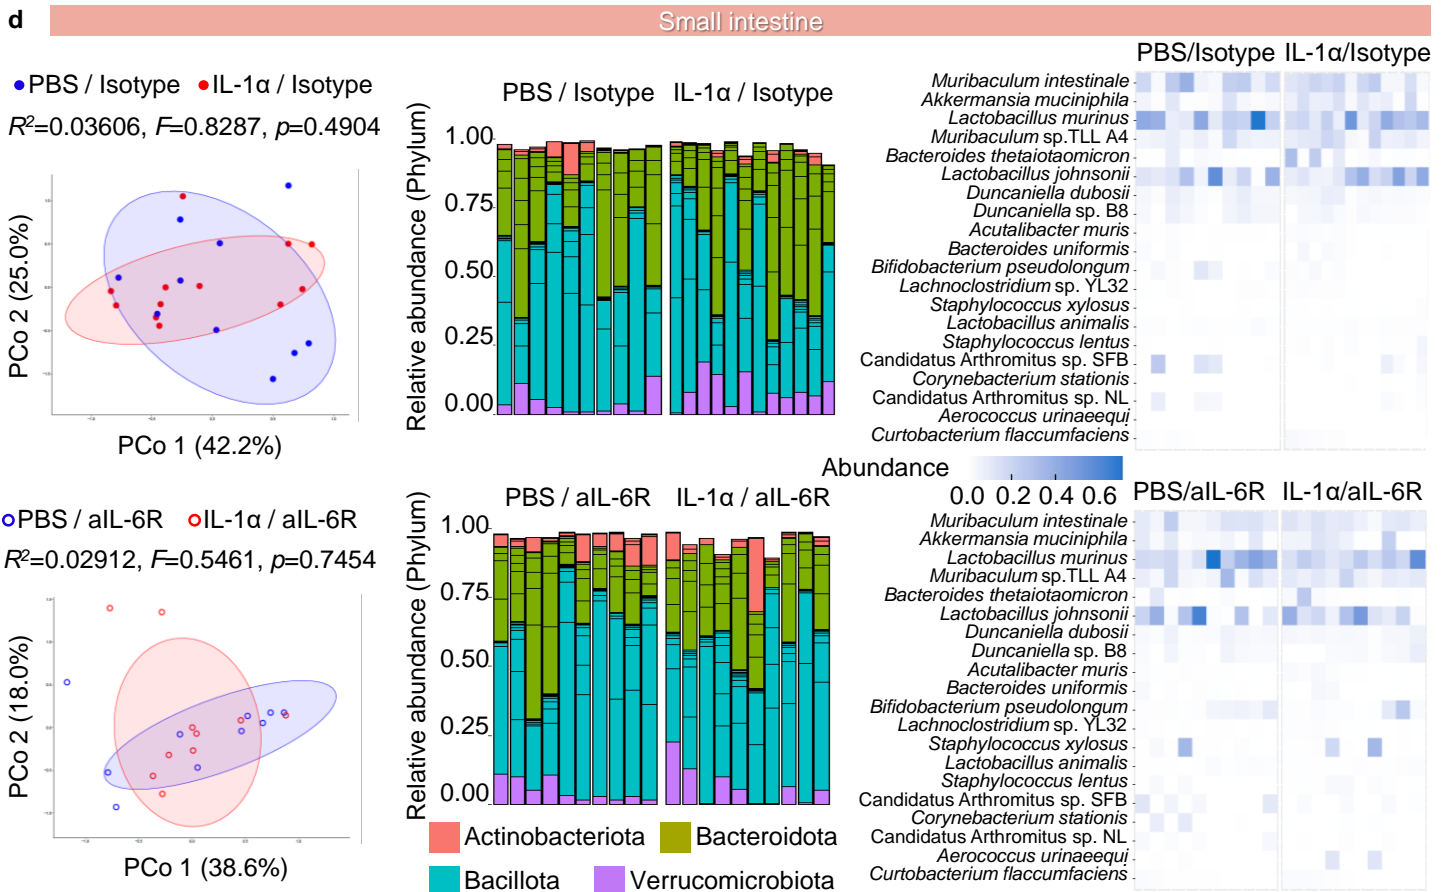

**Fig. S3. Neonatal gut microbiota composition is modified by intra-amniotic IL-1 $\alpha$ , which is partially rescued by aIL-6R treatment. (a)** Dams underwent intra-amniotic injection of PBS (control) or IL-1 $\alpha$  on 16.5 days post coitum (dpc). Six h later, dams received intraperitoneal injection of rat anti-mouse IL-6 receptor monoclonal antibody (aIL-6R) or rat IgG2b isotype (control). Dams were allowed to deliver, and the neonatal small intestine, caecum, and colon were collected on postnatal day (PDN) 21 for microbiome analysis using metagenomic sequencing. **(b)** Differences in abundance of major bacterial phyla (bar plots) and change in the Bacillota:Bacteroidota ratio in the neonatal small intestine, caecum, and colon are shown as box plots where midlines indicate medians, boxes indicate interquartile range, and whiskers indicate minimum/maximum range (n = 7-12 per group). **(c)** Alpha-diversity metrics for the microbiota composition of the neonatal small intestine, caecum, and colon from the four experimental groups (n = 7-12 per group). Data are shown as box-and-whisker plots where midlines indicate medians, boxes indicate interquartile ranges, and whiskers indicate minimum and maximum values. **(d)** Left: principal coordinate analysis (PCoA) illustrating variation in the metagenomic profiles of the neonatal small intestine of the PBS / Isotype and IL-1 $\alpha$  / Isotype groups or PBS / aIL-6R and IL-1 $\alpha$  / aIL-6R groups (n = 10-12 per group). Similarities in the metagenomic profiles (PCoA plots) were characterized using the Bray-Curtis similarity index. Middle: bar plots showing the taxonomic classifications of the 20 bacterial taxa with highest relative abundance in the neonatal intestine of the PBS / Isotype and IL-1 $\alpha$  / Isotype groups or PBS / aIL-6R and IL-1 $\alpha$  / aIL-6R groups (n = 10-12 per group). Right: heatmap displaying the relative abundance and taxonomy of the 20 most relatively abundant bacterial taxa between the metagenomic profiles of the neonatal intestine of the PBS / Isotype and IL-1 $\alpha$  / Isotype groups or PBS / aIL-6R and IL-1 $\alpha$  / aIL-6R groups (n = 10-12 per group). For heatmaps, bacterial taxa with significantly altered abundance between groups are labelled in blue.

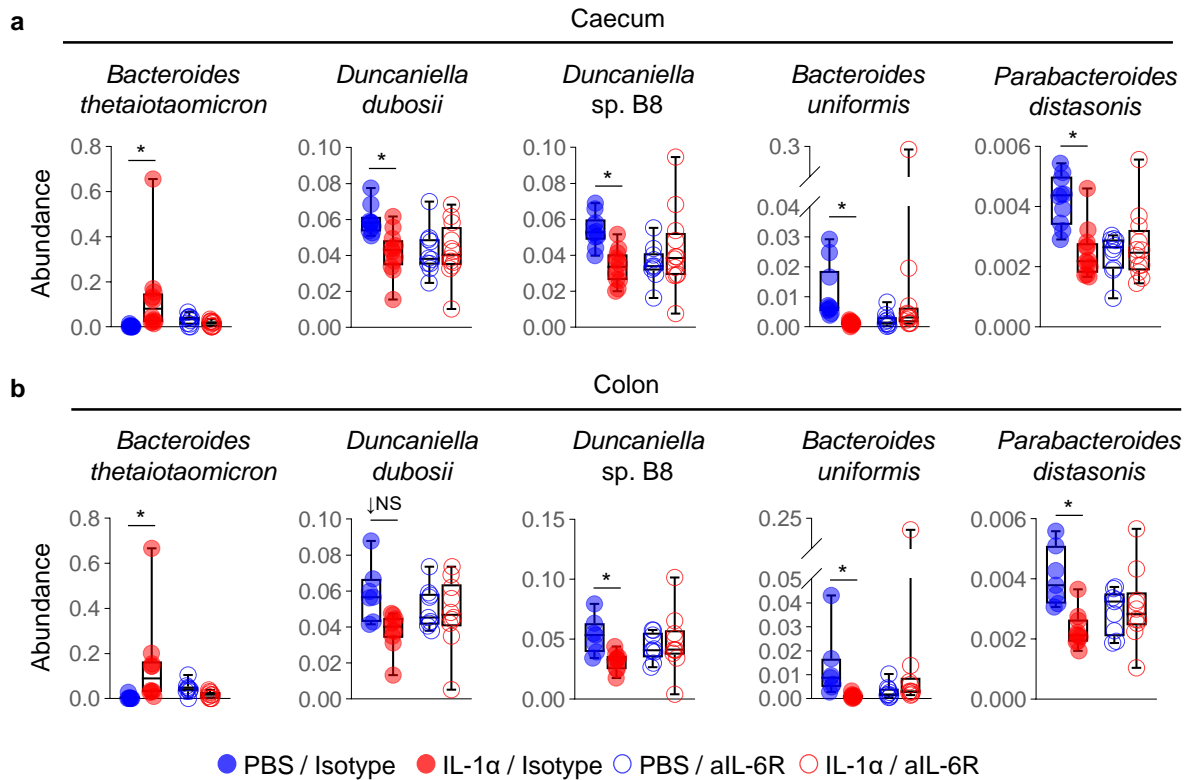

**Fig. S4. Blockade of IL-6R modifies the abundance of specific bacterial taxa in the neonatal caecum and colon.** Alterations in the abundance of specific bacterial taxa in the neonatal **(a)** caecum and **(b)** colon from the four experimental groups ( $n = 10-12$  per group). P-values were determined using two-sided Mann-Whitney U-tests with Holm's correction for multiple comparisons. Data are shown as box-and-whisker plots where midlines indicate medians, boxes indicate interquartile ranges, and whiskers indicate minimum and maximum values. \* $p < 0.05$ ; ↓NS: non-significant tendency for reduction.

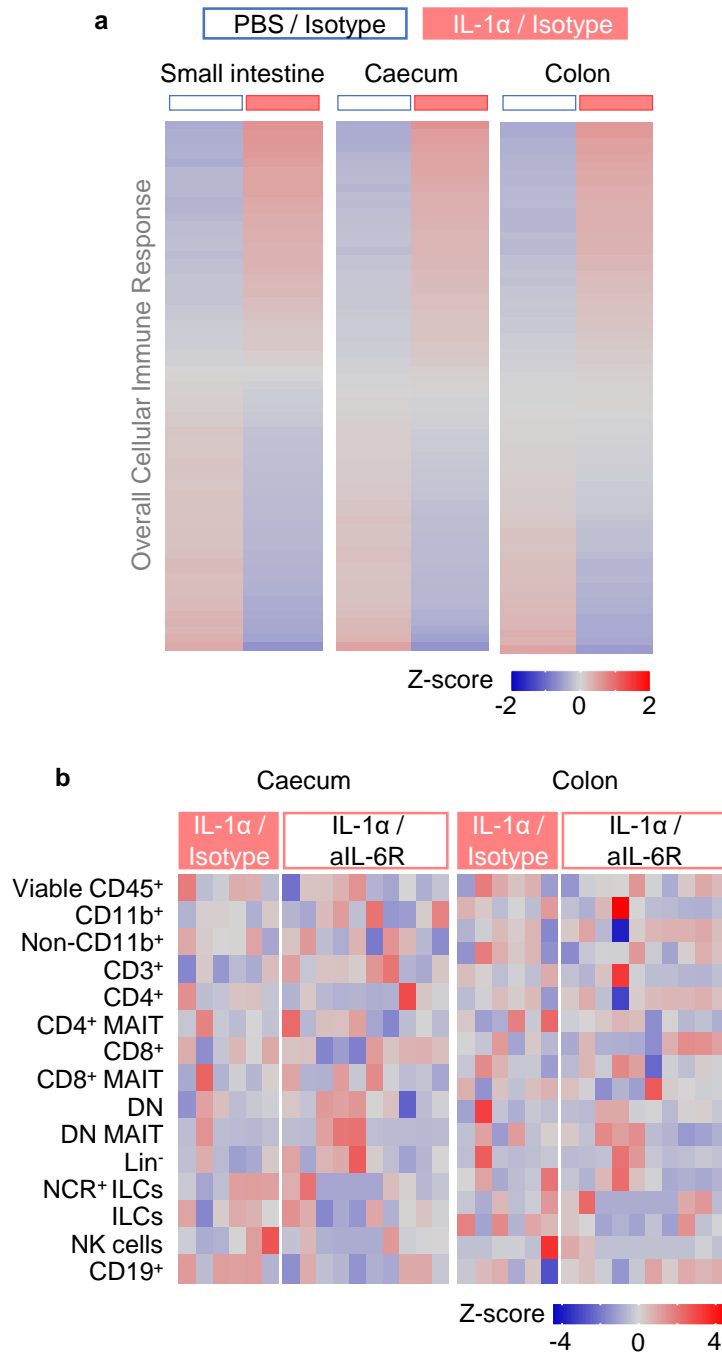

**Fig. S5. Leukocyte proportions in the neonatal gut after intra-amniotic IL-1 $\alpha$  exposure or treatment with aIL-6R.** (a) Heatmap representation showing Z-scores for proportions of all leukocyte subpopulations analyzed in the small intestine, caecum, and colon of neonates born to dams exposed to intra-amniotic injection of PBS or IL-1 $\alpha$  (n = 5-8 per group). (b) Heatmap representation showing Z-scores for cell proportions of the indicated leukocyte subpopulations in caecum and colon samples from neonates born to dams exposed to IL-1 $\alpha$  and treated with aIL-6R or isotype (n = 5-11 per group). Red indicates increased frequency and blue indicates decreased frequency.

**Table S1.** TaqMan assays utilised for RT-PCR

| <b>Name</b>                                                          | <b>Symbol</b>   | <b>Assay ID</b> |
|----------------------------------------------------------------------|-----------------|-----------------|
| Actin, beta                                                          | <i>Actb</i>     | Mm04394036_g1   |
| Glucuronidase, beta                                                  | <i>Gusb</i>     | Mm01197698_m    |
| Glyceraldehyde-3-phosphate dehydrogenase                             | <i>Gapdh</i>    | Mm99999915_g1   |
| Heat shock protein 90 alpha (cytosolic), class B member 1            | <i>Hsp90ab1</i> | Mm00833431_g1   |
| Matrix metalloproteinase 9                                           | <i>Mmp9</i>     | Mm00442991_m1   |
| Claudin 4                                                            | <i>Cldn4</i>    | Mm00515514_s1   |
| Hyaluronan synthase 2                                                | <i>Has2</i>     | Mm00515089_m1   |
| Interleukin 1 alpha                                                  | <i>Il1a</i>     | Mm00439620_m1   |
| Interleukin 1 beta                                                   | <i>Il1b</i>     | Mm00434228_m1   |
| Interleukin 6                                                        | <i>Il6</i>      | Mm00446190_m1   |
| Interleukin 10                                                       | <i>Il10</i>     | Mm01288386_m1   |
| Interleukin 12a                                                      | <i>Il12a</i>    | Mm00434169_m1   |
| Interleukin 12b                                                      | <i>Il12b</i>    | Mm01288989_m1   |
| Interleukin 13                                                       | <i>Il13</i>     | Mm00434204_m1   |
| Interleukin 33                                                       | <i>Il33</i>     | Mm00505403_m1   |
| Tumor necrosis factor                                                | <i>Tnf</i>      | Mm00443258_m1   |
| Interferon gamma                                                     | <i>Ifng</i>     | Mm01168134_m1   |
| Chemokine (C-C motif) ligand 2                                       | <i>Ccl2</i>     | Mm00441242_m1   |
| Chemokine (C-C motif) ligand 3                                       | <i>Ccl3</i>     | Mm00441259_g1   |
| Chemokine (C-C motif) ligand 5                                       | <i>Ccl5</i>     | Mm01302427_m1   |
| Chemokine (C-C motif) ligand 17                                      | <i>Ccl17</i>    | Mm01244826_g1   |
| Chemokine (C-X-C motif) ligand 1                                     | <i>Cxcl1</i>    | Mm04207460_m1   |
| Chemokine (C-X-C motif) ligand 9                                     | <i>Cxcl9</i>    | Mm00434946_m1   |
| Chemokine (C-X-C motif) ligand 10                                    | <i>Cxcl10</i>   | Mm00445235_m1   |
| Chemokine (C-C motif) receptor 5                                     | <i>Ccr5</i>     | Mm01963251_s1   |
| CD68 antigen                                                         | <i>Cd68</i>     | Mm03047343_m1   |
| Interleukin 1 receptor, type I                                       | <i>Il1r1</i>    | Mm00434237_m1   |
| Interleukin 10 receptor, alpha                                       | <i>Il10ra</i>   | Mm00434151_m1   |
| Interleukin 10 receptor, beta                                        | <i>Il10rb</i>   | Mm00434157_m1   |
| Tumor necrosis factor receptor superfamily, member 1a                | <i>Tnfrsf1a</i> | Mm00441883_g1   |
| Tumor necrosis factor receptor superfamily, member 1b                | <i>Tnfrsf1b</i> | Mm00441889_m1   |
| Purinergic receptor P2X, ligand-gated ion channel, 7                 | <i>P2rx7</i>    | Mm01199500_m1   |
| PYD and CARD domain containing                                       | <i>Pycard</i>   | Mm00445747_g1   |
| Nuclear factor of kappa light polypeptide gene enhancer in B cells 1 | <i>Nfkb1</i>    | Mm00476361_m1   |
| Nuclear factor of kappa light polypeptide gene enhancer in B cells 2 | <i>Nfkb2</i>    | Mm00479807_m1   |
| NLR family, pyrin domain containing 3                                | <i>Nlrp3</i>    | Mm00840904_m1   |
| NLR family, pyrin domain containing 6                                | <i>Nlrp6</i>    | Mm00460229_m1   |
| Caspase 1                                                            | <i>Casp1</i>    | Mm00438023_m1   |
| Caspase 4, apoptosis-related cysteine peptidase                      | <i>Casp11</i>   | Mm00432304_m1   |
| Myeloid differentiation primary response gene 88                     | <i>Myd88</i>    | Mm00440338_m1   |
| Arginase, liver                                                      | <i>Arg1</i>     | Mm00475988_m1   |
| Nitric oxide synthase 2, inducible                                   | <i>Nos2</i>     | Mm00440502_m1   |
| Leucine-rich alpha-2-glycoprotein 1                                  | <i>Lrg1</i>     | Mm01278767_m1   |
| Absent in melanoma 2                                                 | <i>Aim2</i>     | Mm01295719_m1   |
| Insulin-like growth factor 2                                         | <i>Igf2</i>     | Mm00439564_m1   |
| S100 calcium binding protein A9 (calgranulin B)                      | <i>S100a9</i>   | Mm00656925_m1   |
| Jun proto-oncogene                                                   | <i>Jun</i>      | Mm07296811_s1   |
| FBJ osteosarcoma oncogene                                            | <i>Fos</i>      | Mm00487425_m1   |
| Suppressor of cytokine signaling 3                                   | <i>Socs3</i>    | Mm00545913_s1   |
| Toll-like receptor 9                                                 | <i>Tlr9</i>     | Mm00446193_m1   |
| Glutamate receptor, metabotropic 5                                   | <i>mGluR5</i>   | Mm00690332_m1   |
| Regulator of G-protein signaling 4                                   | <i>Rgs4</i>     | Mm00501389_m1   |
| KDM1 lysine (K)-specific demethylase 6B                              | <i>Kdm6b</i>    | Mm01332680_m1   |



**Table S2.** List of antibodies utilised for flow cytometry.

| Antigen/isotype        | Fluorochrome | Clone      | Company        | Cat #      | RRID        |
|------------------------|--------------|------------|----------------|------------|-------------|
| CD45                   | AF700        | 30-F11     | BD Biosciences | 560510     | AB_1645208  |
| CD3                    | BV650        | 145-2C11   | BD Biosciences | 564378     | AB_2738779  |
| CD4                    | PE-Cy5       | RM4-5      | BD Biosciences | 553050     | AB_394586   |
| CD8                    | APC-Cy7      | 53-6.7     | BD Biosciences | 557654     | AB_396769   |
| CD11b                  | PE-CF594     | M1/70      | BD Biosciences | 562317     | AB_11154422 |
| ID2                    | APC          | ILCID2     | ThermoFisher   | 17-9475-82 | AB_2735051  |
| NK1.1                  | PerCP-Cy5.5  | S17016D    | Biolegend      | 156526     | AB_2894655  |
| GATA3                  | BV395        | L50-823    | BD Biosciences | 565448     | AB_2739241  |
| ROR $\gamma$ t         | BV421        | Q31-378    | BD Biosciences | 562894     | AB_2687545  |
| IFN $\gamma$           | BV737        | XMG1.2     | BD Biosciences | 564693     | AB_2722494  |
| TCR Vb6                | PE           | RR4-7      | Biolegend      | 140004     | AB_10643583 |
| IL10                   | BV605        | JES5-16E3  | BD Biosciences | 564082     | AB_2738582  |
| CD19                   | BV711        | ID3        | BD Biosciences | 563157     | AB_2738035  |
| TGF $\beta$            | PE-Cy7       | TW7-16B4   | eBioscience    | 25-9821-82 | AB_2573554  |
| FoxP3                  | AF488        | MF23       | BD Biosciences | 560403     | AB_1645192  |
| IL17A                  | BV786        | TC11-18H10 | BD Biosciences | 564171     | AB_2738642  |
| Mouse / IgG1, $\kappa$ | APC          | P3.6.2.8.1 | ThermoFisher   | 17-4714-82 | AB_763649   |
| Rat IgG1, $\kappa$     | BUV737       | R3-34      | BD Biosciences | 564690     | AB_2869604  |
| Rat IgG2b              | BV605        | R35-38     | BD Biosciences | 563145     | AB_2869464  |
| Mouse IgG1, $\kappa$   | PE-Cy7       | P3.6.2.8.1 | eBioscience    | 25-4714-80 | AB_657914   |
| Rat IgG2b              | AF488        | A95-1      | BD Biosciences | 557726     | AB_396834   |
| Rat IgG1               | BV786        | R3-34      | BD Biosciences | 563847     | AB_2869525  |
| Mouse IgG2a            | BV421        | G155-178   | BD Biosciences | 562439     | AB_11151914 |
| Mouse IgG1             | BUV395       | X40        | BD Biosciences | 563547     | AB_2869503  |

**Table S3.** Preterm labour-associated differential expression of *Il6* in murine uterine and decidual cell types.

| Location   | Cell type                   | Base Mean | log <sub>2</sub> Fold Change | Fold Change | lfcSE | Stat  | p-value  | adj p-value |
|------------|-----------------------------|-----------|------------------------------|-------------|-------|-------|----------|-------------|
| Myometrium | 17_Endothelial              | 14.852    | 6.570                        | 94.982      | 1.351 | 4.864 | 1.15E-06 | 1.63E-04    |
| Decidua    | 9_Macrophage                | 48.093    | 5.773                        | 54.672      | 0.907 | 6.362 | 2.00E-10 | 1.68E-08    |
| Myometrium | 9_Macrophage                | 65.042    | 5.496                        | 45.119      | 0.999 | 5.499 | 3.83E-08 | 6.03E-07    |
| Myometrium | 0_Fibroblast-1              | 43.804    | 5.352                        | 40.847      | 1.063 | 5.034 | 4.80E-07 | 2.26E-05    |
| Decidua    | 2_Stromal-1                 | 29.162    | 5.296                        | 39.300      | 1.403 | 3.776 | 1.59E-04 | 0.017       |
| Decidua    | 13_Epithelial-5 (Luminal)   | 6.991     | 5.292                        | 39.183      | 1.194 | 4.431 | 9.38E-06 | 6.38E-04    |
| Myometrium | 15_SMC-1                    | 2.373     | 5.220                        | 37.264      | 1.499 | 3.481 | 4.99E-04 | 0.019       |
| Myometrium | 14_Epithelial-6 (Secretory) | 2.474     | 4.799                        | 27.834      | 1.671 | 2.872 | 0.004    | 0.041       |
| Myometrium | 3_Monocyte                  | 146.590   | 4.240                        | 18.894      | 0.573 | 7.394 | 1.43E-13 | 1.05E-11    |
| Myometrium | 12_Stromal-3                | 31.586    | 4.186                        | 18.208      | 1.248 | 3.355 | 7.92E-04 | 0.011       |
| Myometrium | 1_Fibroblast-2              | 47.682    | 4.020                        | 16.228      | 1.010 | 3.981 | 6.86E-05 | 0.002       |
| Decidua    | 0_Fibroblast-1              | 19.835    | 3.572                        | 11.896      | 0.730 | 4.894 | 9.89E-07 | 7.33E-05    |
| Decidua    | 4_Stromal-2 (Decidua)       | 7.552     | 3.472                        | 11.094      | 0.943 | 3.681 | 2.32E-04 | 0.049       |
| Decidua    | 3_Monocyte                  | 150.939   | 3.300                        | 9.850       | 0.799 | 4.133 | 3.58E-05 | 5.93E-04    |
| Decidua    | 12_Stromal-3                | 29.901    | 2.073                        | 4.208       | 0.703 | 2.950 | 0.003    | 0.044       |
| Decidua    | 1_Fibroblast-2              | 94.814    | 1.943                        | 3.845       | 0.608 | 3.196 | 0.001    | 0.031       |
